# Supplementary material
Source: PubMed Central journal article supplement (PMC3822802)

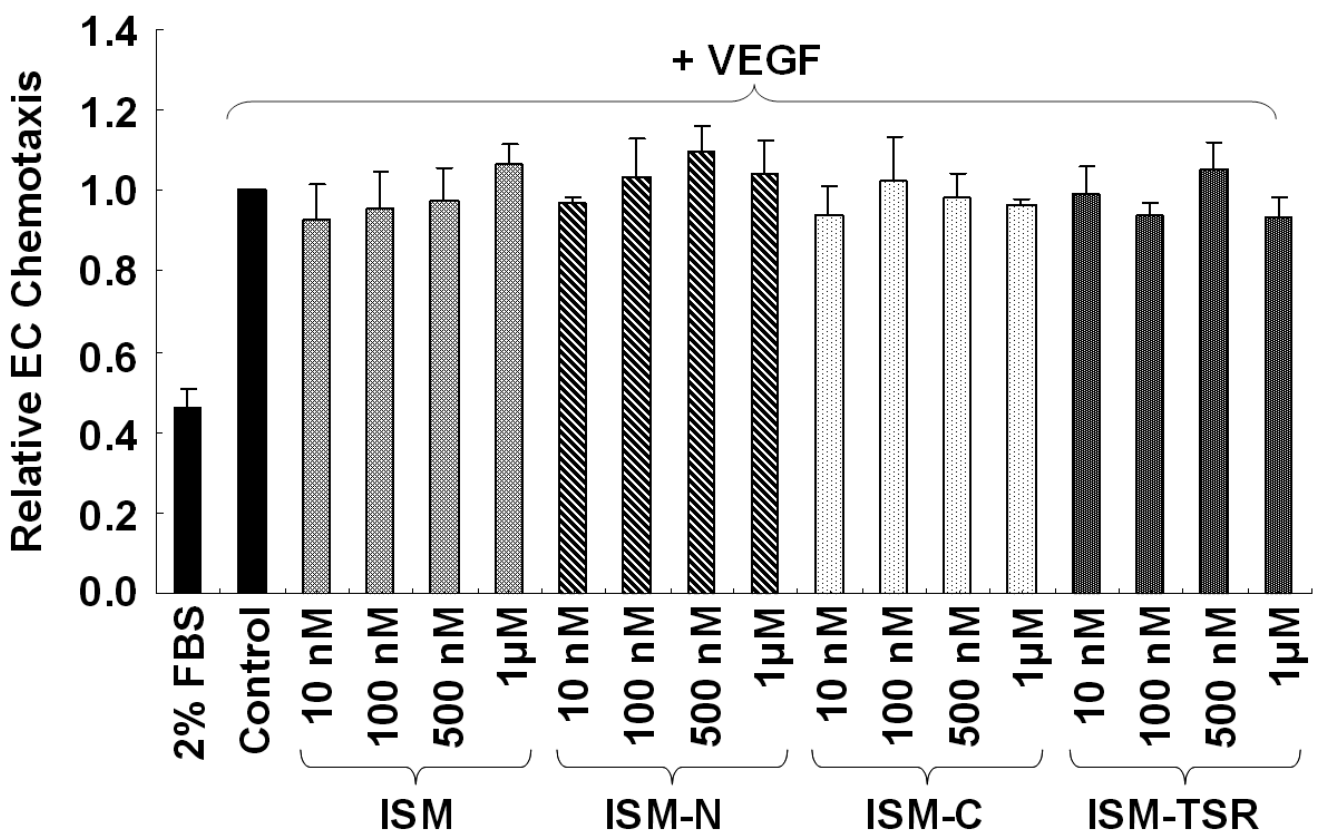

Supplement: jcmm0015-0359-SD1.pdf [file jcmm0015-0359-SD1.pdf]

**A**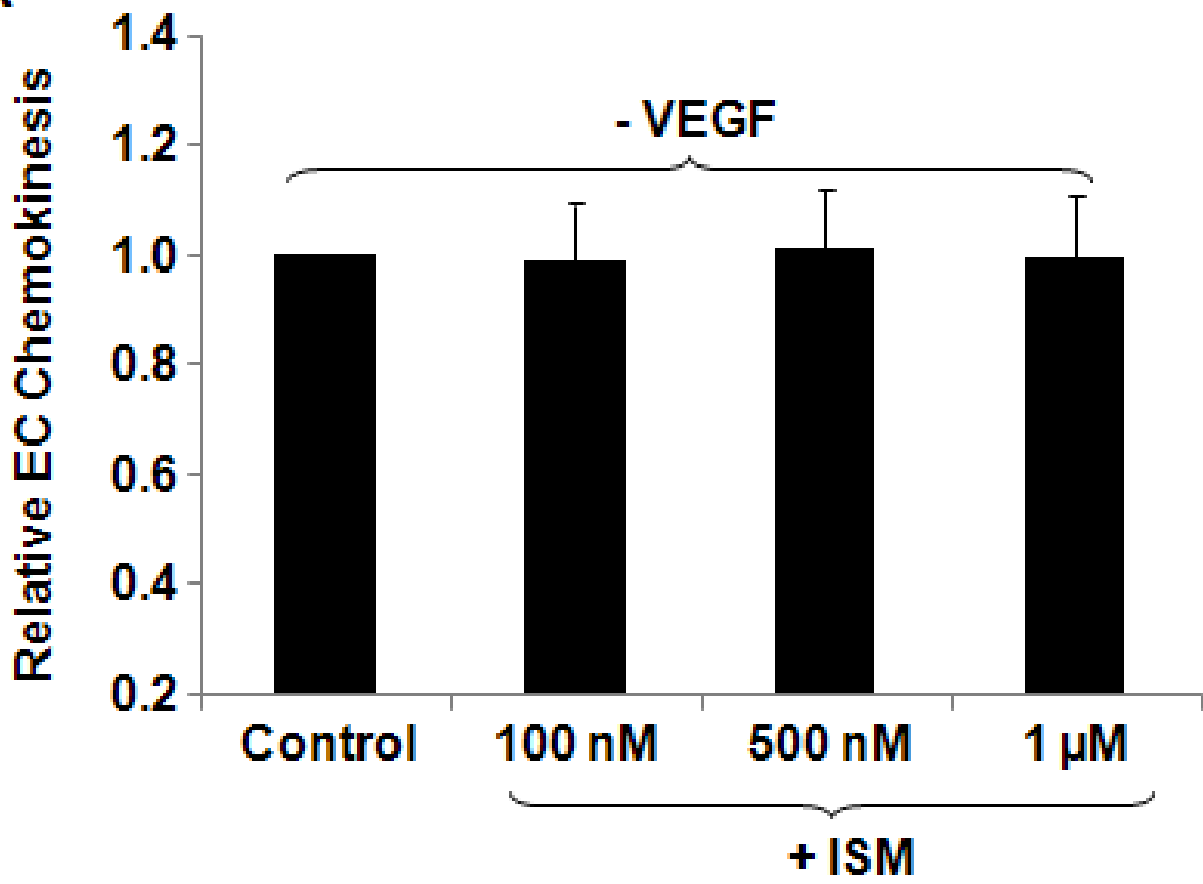**B**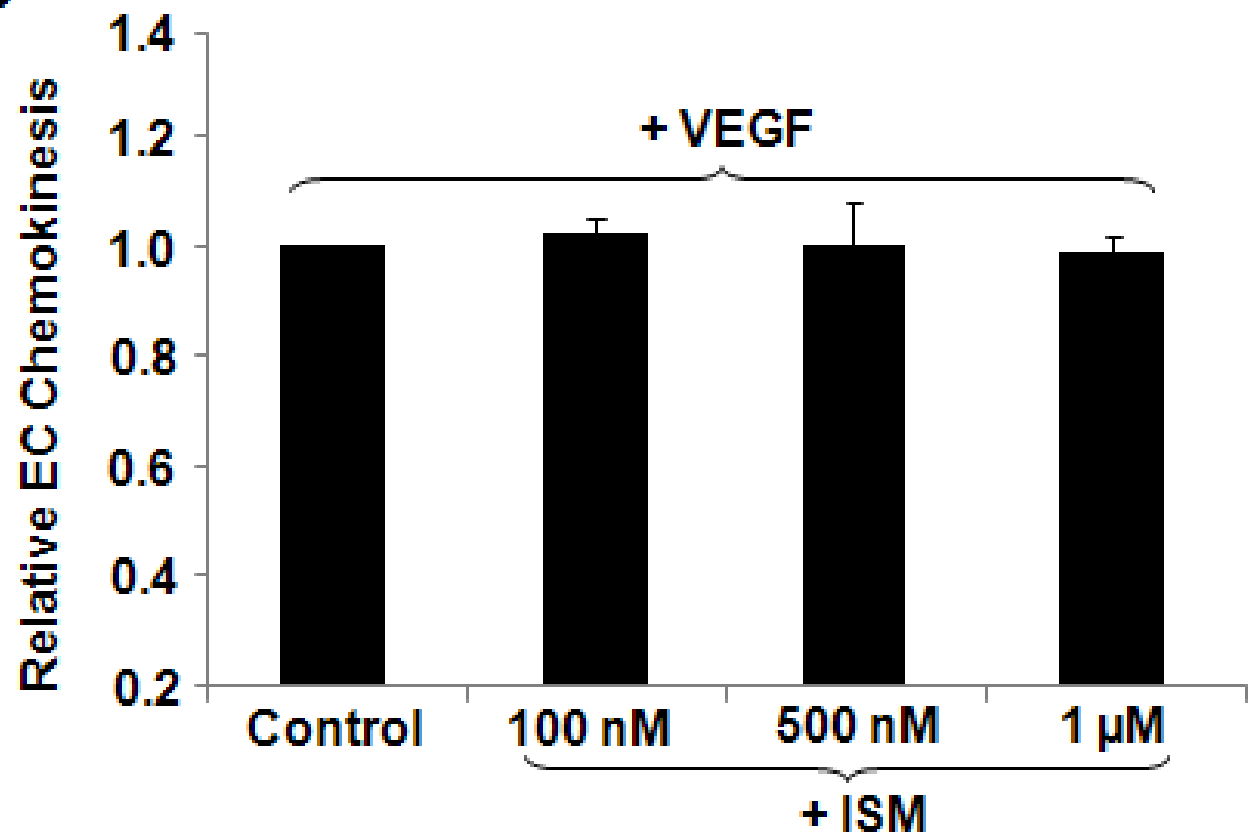

Supplement: jcmm0015-0359-SD2.pdf [file jcmm0015-0359-SD2.pdf]

**A**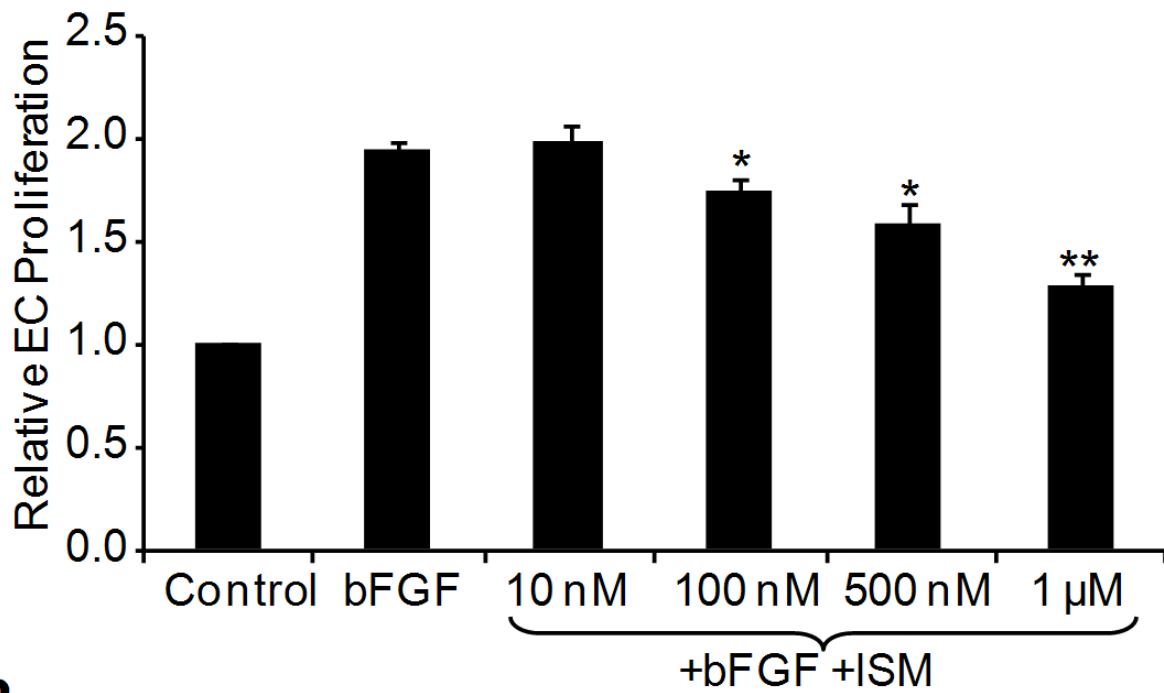**B**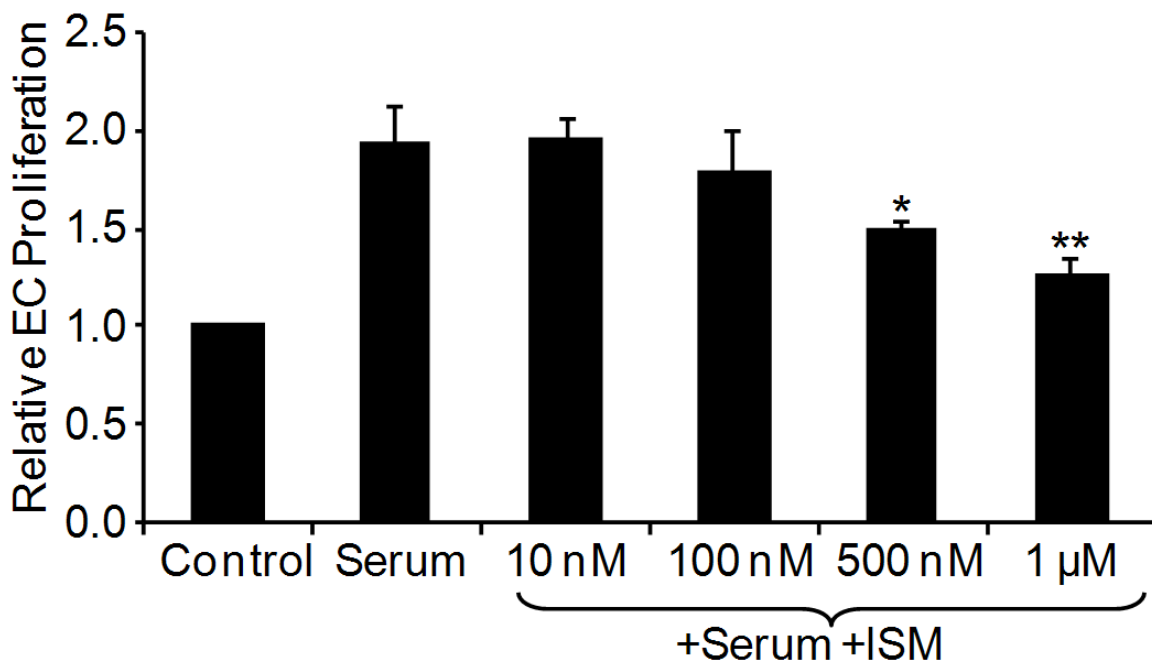

Supplement: jcmm0015-0359-SD3.pdf [file jcmm0015-0359-SD3.pdf]

**A**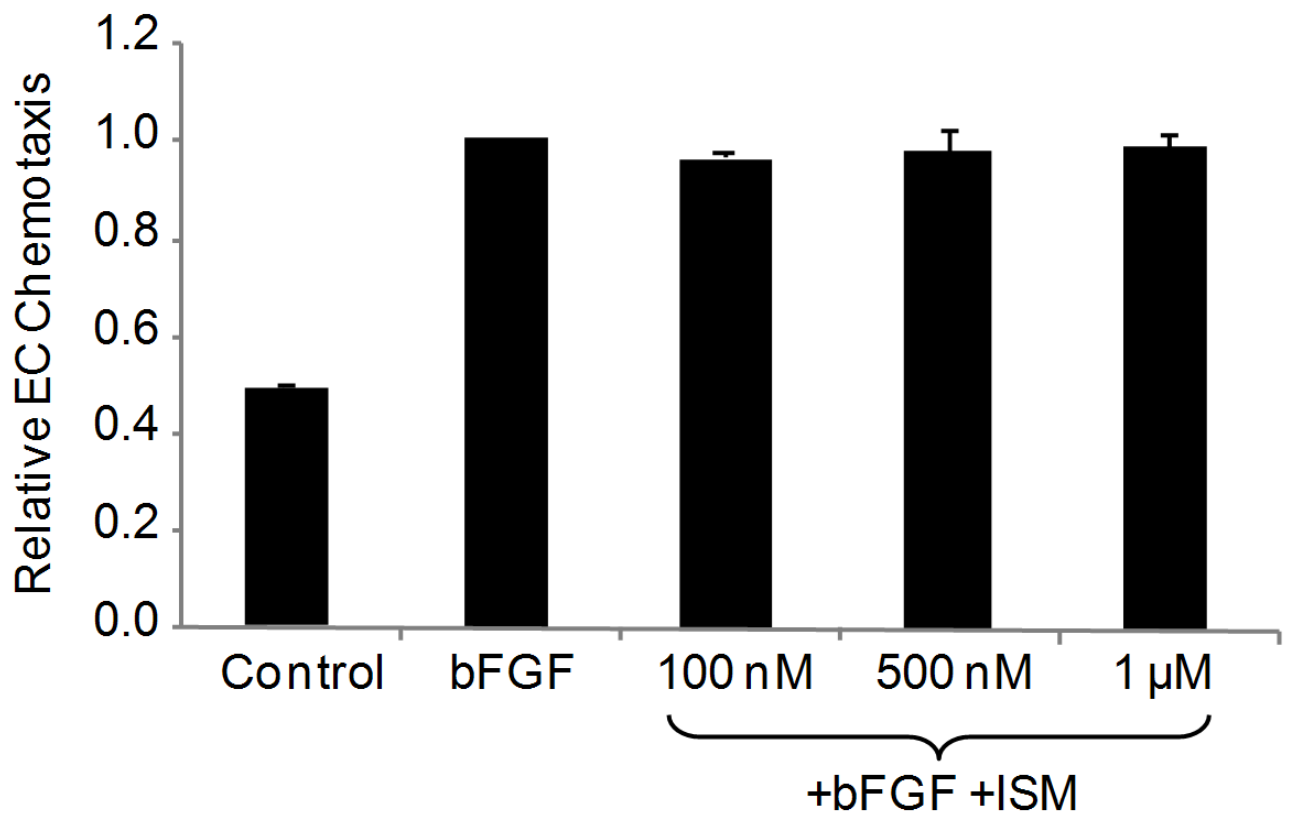**B**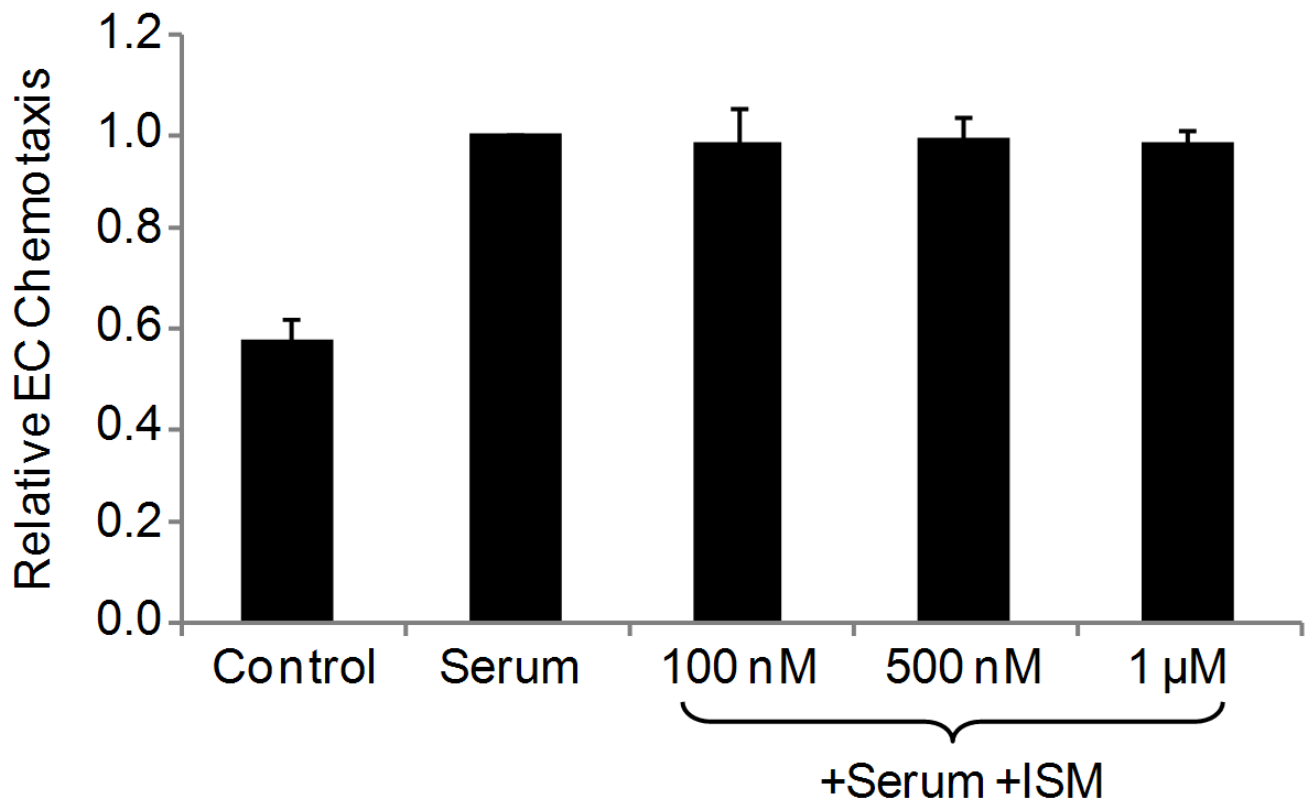

Supplement: jcmm0015-0359-SD4.pdf [file jcmm0015-0359-SD4.pdf]

**A**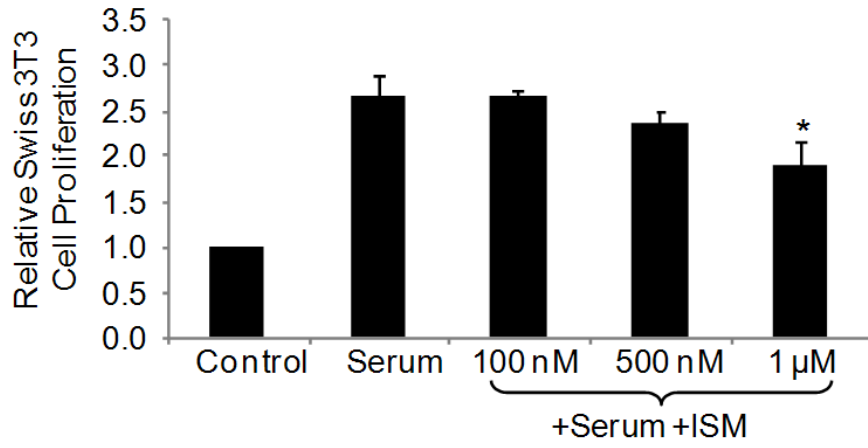**B**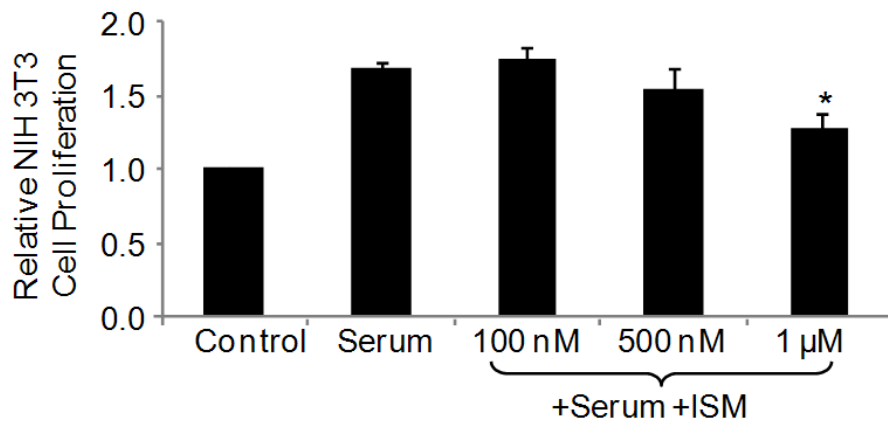**C**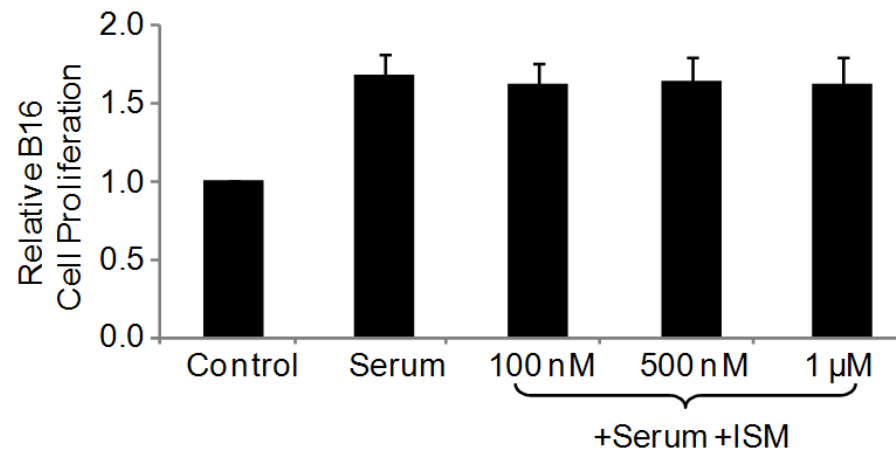**D**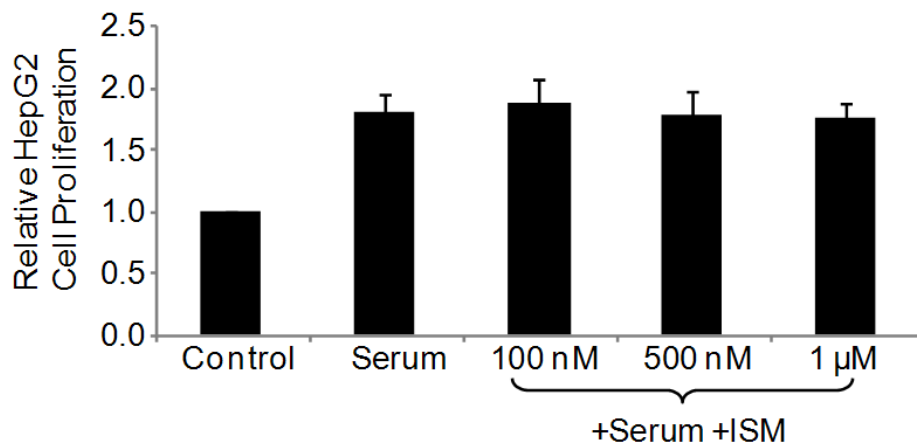

Supplement: jcmm0015-0359-SD5.pdf [file jcmm0015-0359-SD5.pdf]

**A**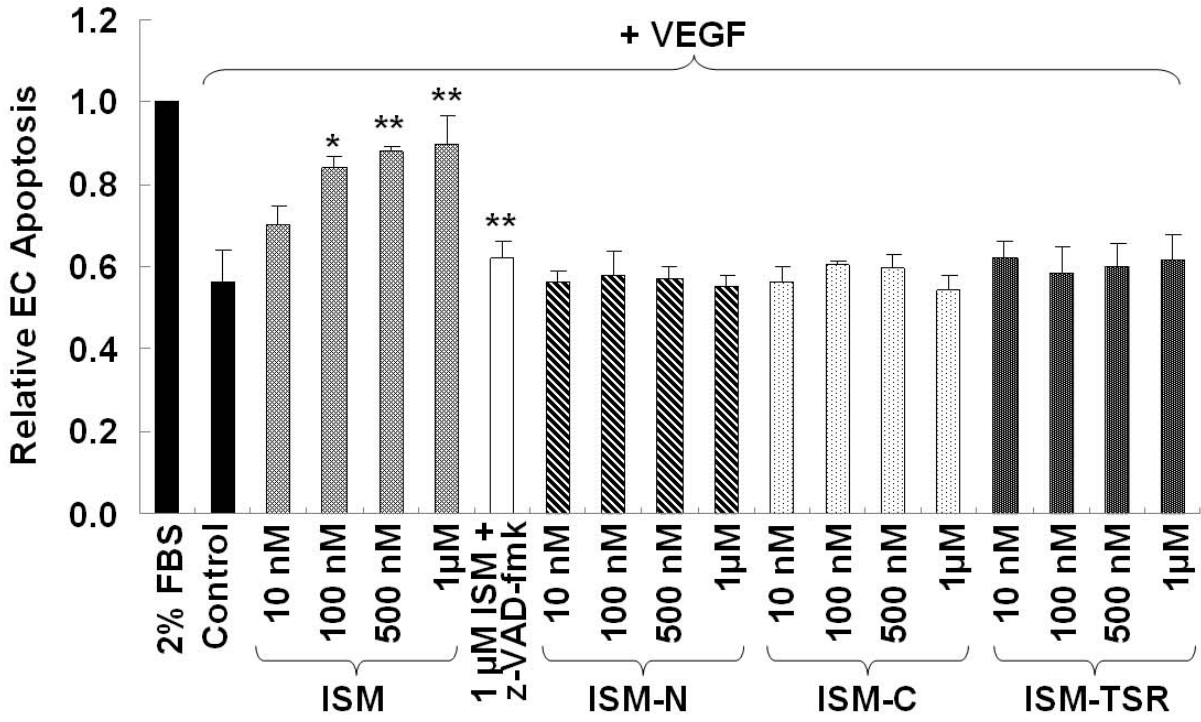**B**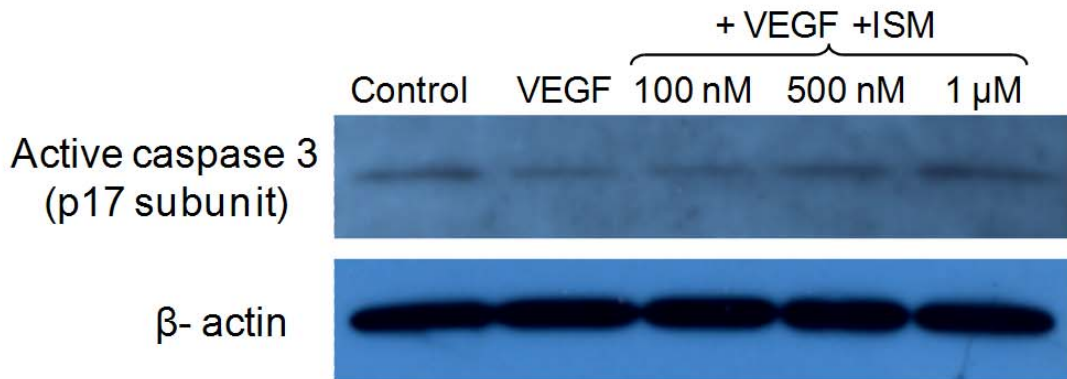

Supplement: jcmm0015-0359-SD6.pdf [file jcmm0015-0359-SD6.pdf]

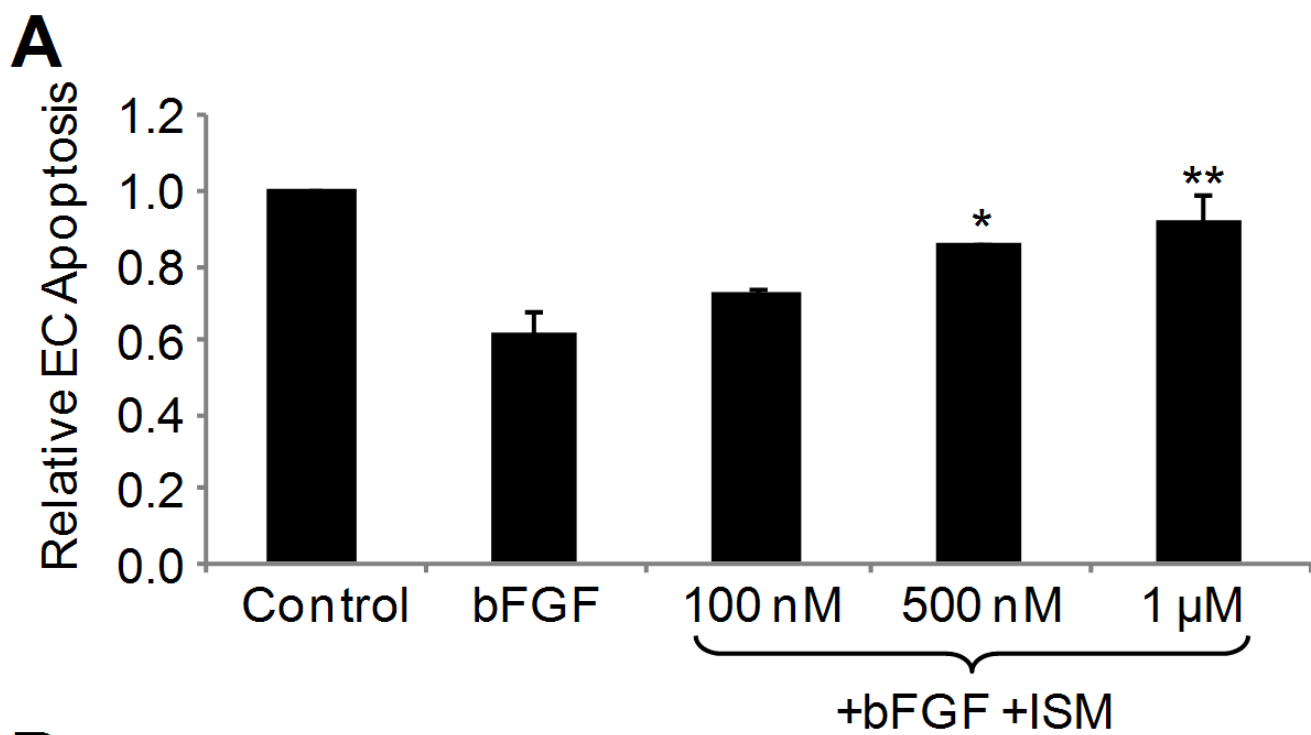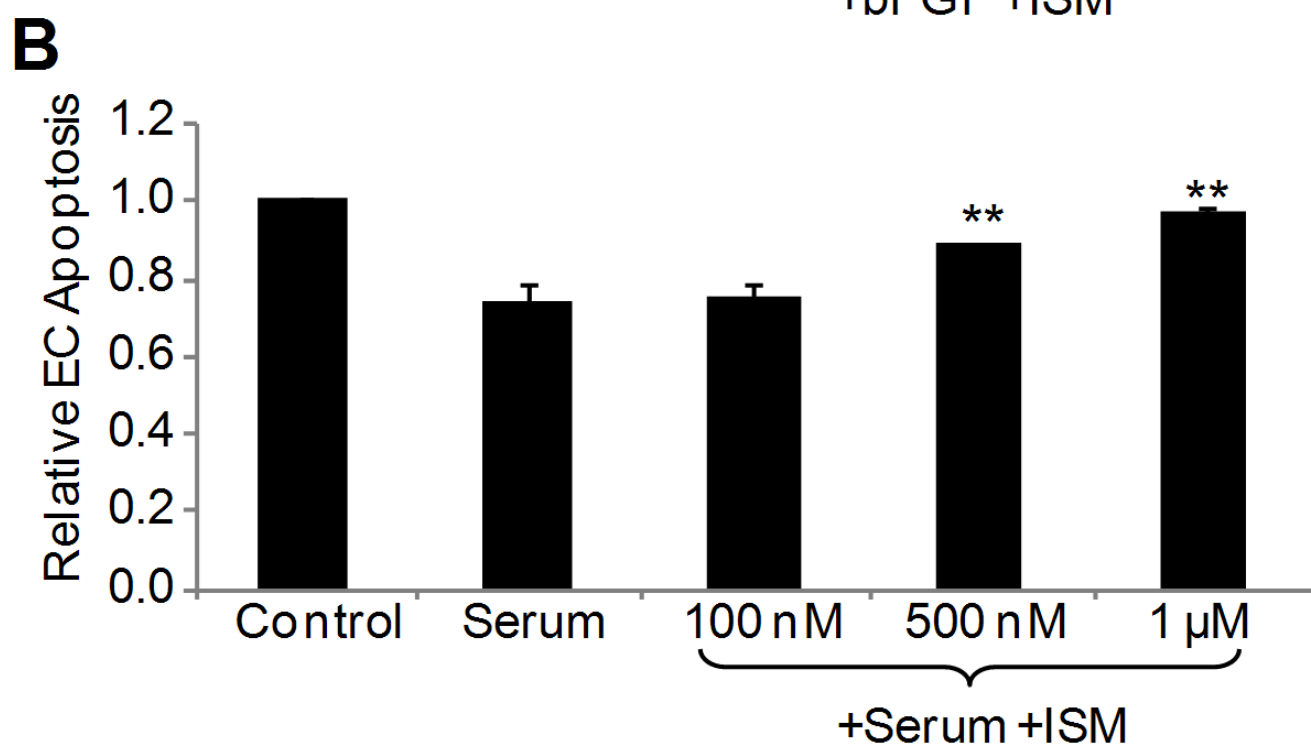

Supplement: jcmm0015-0359-SD7.pdf [file jcmm0015-0359-SD7.pdf]

**A**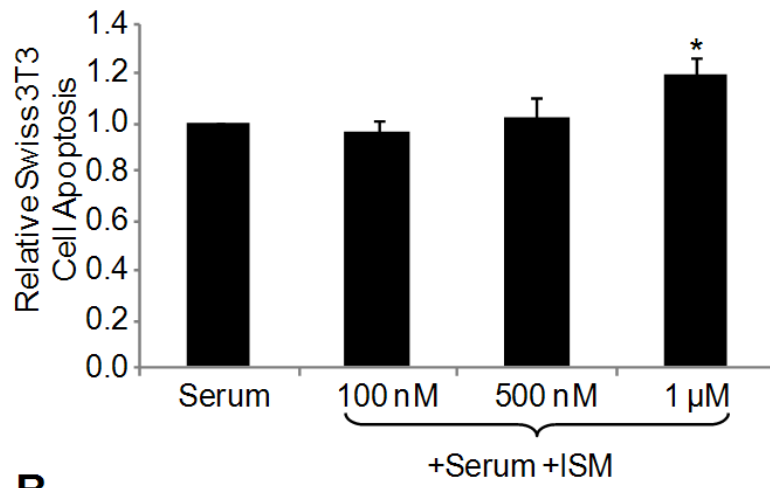**B**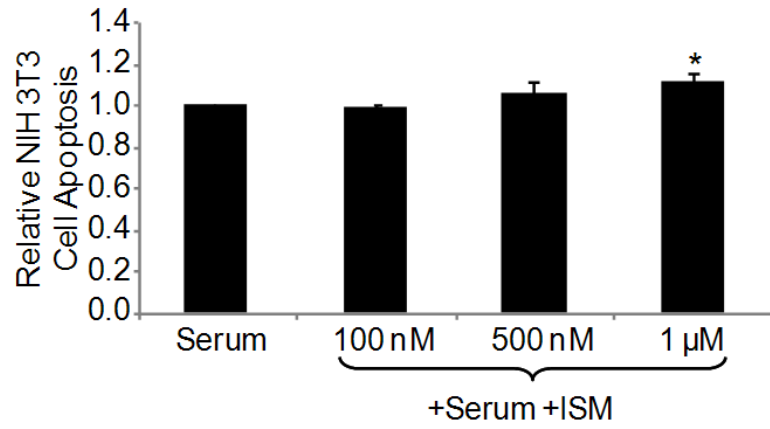**C**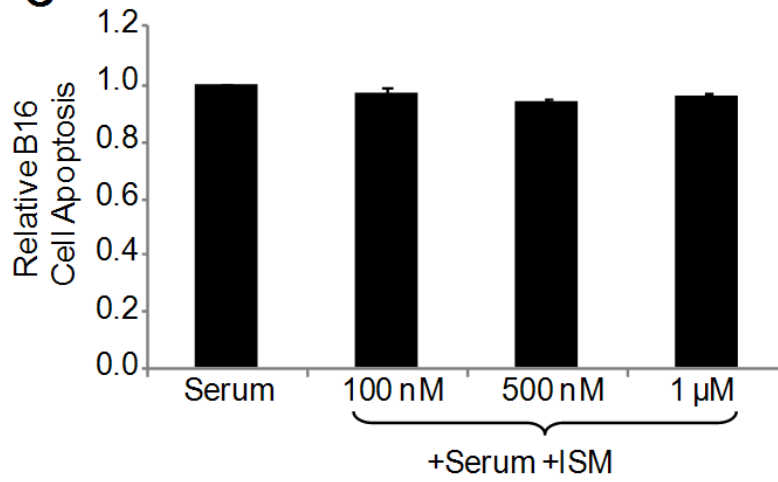**D**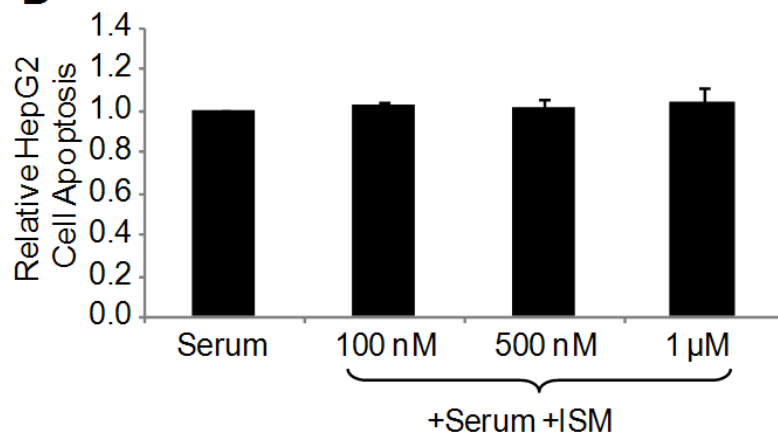

Supplement: jcmm0015-0359-SD8.pdf [file jcmm0015-0359-SD8.pdf]

Gelatin Coated

Control

100 nM ISM

500 nM ISM

1 $\mu$ M ISM

15 min

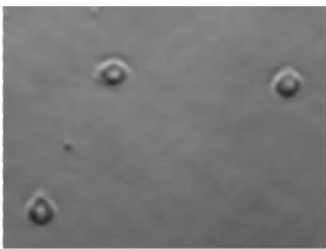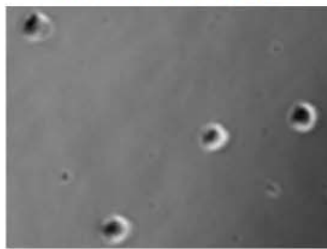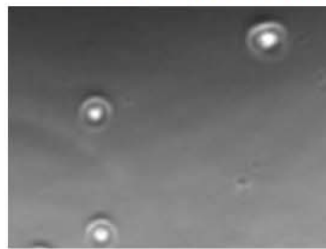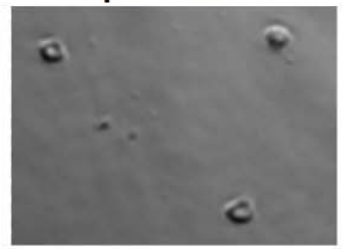

30 min

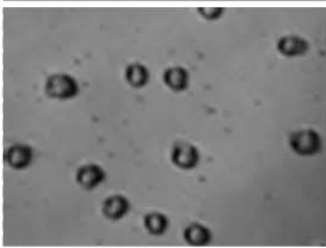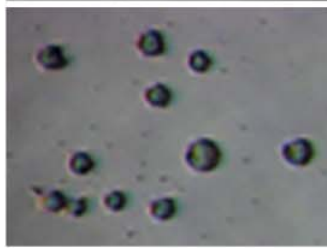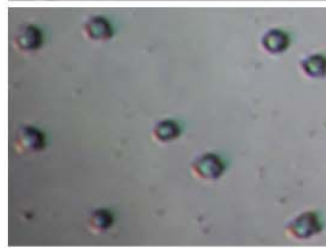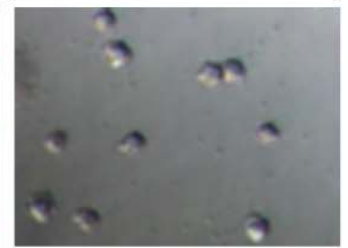

1 h

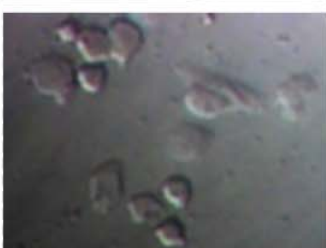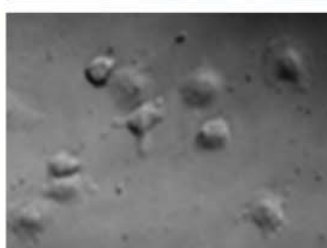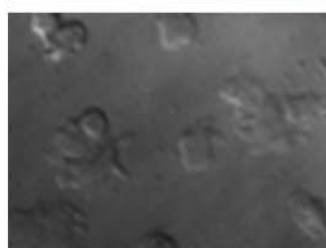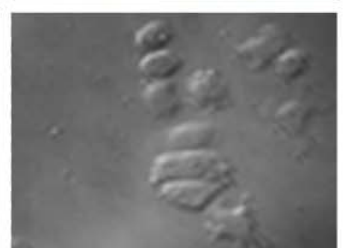

2 h

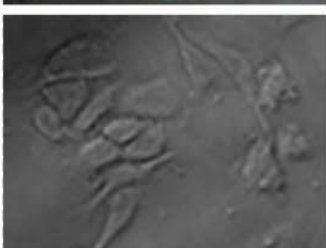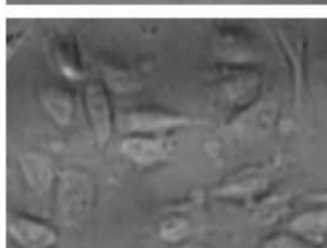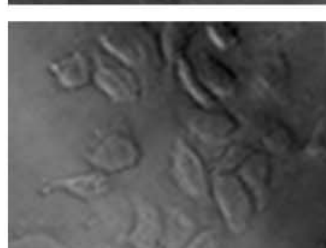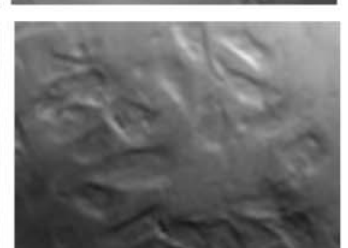

Supplement: jcmm0015-0359-SD9.pdf [file jcmm0015-0359-SD9.pdf]
